# Supplementary material for: Prognostic Value of the Serum HER2 Extracellular Domain Level in Breast Cancer: A Systematic Review and Meta-Analysis
Source: MDPI journal article supplement (doi:10.3390/cancers14194551), 2022-09-20

## Supplementary Materials

**Table S1.** Full search strategy in PubMed (a), Embase (b), the Cochrane Library (c) Web of Science (d) and Scopus (e).

**Table S2.** Newcastle–Ottawa Quality Assessment form for non-randomized studies.

**Figure S1.** Sensitivity analysis for PFS(a), DFS(b), OS(c) and ORR(d).

**Figure S2.** Subgroup analysis of PFS according to different treatment modalities(a), cut-off values(b) and ethnicity(c).

**Figure S3.** Subgroup analysis of DFS according to different treatment modalities(a), cut-off values(b) and ethnicity(c).

**Figure S4.** Subgroup analysis of OS according to different treatment modalities(a), cut-off values(b), disease status(c) and ethnicity(d).

**Figure S5.** Subgroup analysis of ORR according to different treatment modalities(a), cut-off values(b) and ethnicity(c).

**Figure S6.** Funnel plot to detect publication bias for PFS(a), DFS(b), OS(c) and ORR(d).

**Figure S7.** Trim and fill analysis for pooled HR of PFS.

**Supplementary Table S1** Detailed searching strategies.

a. Search strategy in PubMed, May 2<sup>nd</sup>, 2022. (n=758)

**Search terms:** (((("Breast Neoplasms"[Mesh])OR((breast OR mammary) AND (cancer OR carcinoma OR malignancy OR neoplasm OR tumor))) AND (("Receptor, ErbB-2"[Mesh])OR((HER-2 OR HER2 OR neu OR ERBB2 OR "human epidermal growth factor receptor 2")))) AND (("extracellular domain" OR ECD OR "soluble HER2" OR "serum HER2" OR sHER2))

b. Search strategy in Embase, May 2<sup>nd</sup>, 2022. (n=526)

**Search terms:**

#10 #3 AND #6 AND #9

#9 #7 OR #8

#8 'ecd':abti OR 'soluble her2':abti OR 'serum her2':abtiOR'sher2'abti

#7 extracellular domain'/exp

#6 #4 OR #5

#5 'her-2':ab.ti OR 'her2':ab.ti OR 'neu':ab.ti OR 'erbb2':abti OR 'human epidermal arowth factor receptor 2':ab.ti

#4 "epidermal growth factor receptor 2'/exp

#3 #1 OR #2

#2 ('breast':ab,ti OR 'mammary':ab,ti) AND ('cancer':abti OR 'carcinoma':ab,ti OR 'malignancy':ab,ti OR 'neoplasm':ab,ti OR 'tumor':abti)

#1 'breast cancer'/exp

c. Search strategy in the Cochrane Library, May 2<sup>nd</sup>, 2022. (n=97)

**Search terms:**

(((("Breast Neoplasms"[Mesh])OR((breast OR mammary) AND (cancer OR carcinoma OR malignancy OR neoplasm OR tumor))) AND (("Receptor, ErbB-2"[Mesh])OR((HER-2 OR HER2 OR neu OR ERBB2 OR "human epidermal growth factor receptor 2")))) AND (("extracellular domain" OR ECD OR "soluble HER2" OR "serum HER2" OR sHER2))

d. Search strategy in the Web of Science, Sept 11<sup>th</sup>, 2022. (n=98)

**Search terms:**

#10 #8 AND #9 AND #6

#9 #4 OR #5

#8 #1 OR #7

#7 #2 AND #3

#6 ALL=("extracellular domain" OR ECD OR "soluble HER2" OR "serum HER2" OR sHER2)

#5 ALL=(HER-2 OR HER2 OR neu OR ERBB2 OR "human epidermal growth factor

receptor 2")

#4 TS="Receptor, ErbB-2"

#3 ALL=(cancer OR carcinoma OR malignancy OR neoplasm OR tumor)

#2 ALL=(breast OR mammary)

#1 TS=Breast Neoplasms

e. Search strategy in the Scopus, Sept 11<sup>th</sup>, 2022. (n=779)

**Search terms:**

(( KEY ( "Breast Neoplasms" ) ) OR ( TITLE-ABS-KEY ( ( breast OR mammary ) AND ( cancer OR carcinoma OR malignancy OR neoplasm OR tumor ) ) ) ) AND ( ( KEY ( "Receptor, ErbB-2" ) ) OR ( TITLE-ABS-KEY ( her-2 OR her2 OR neu OR erbb2 OR "human epidermal growth factor receptor 2" ) ) ) AND ( TITLE-ABS-KEY ( "extracellular domain" OR ecd OR "soluble HER2" OR "serum HER2" OR sher2 ) ) )

**Supplementary Table S2.** Newcastle-Ottawa Quality Assessment form for non-randomized studies.

| Studies                    | Selection | Comparability | Outcome | Quality Assessment |
|----------------------------|-----------|---------------|---------|--------------------|
| Banys et al. 2017          | * * * *   | *             | * *     | Good quality       |
| Baric et al. 2015          | * * *     | *             | * *     | Poor quality       |
| Bewick et al. 2001         | * * * *   | *             | * * *   | Good quality       |
| Bramwell et al. 2009       | * * * *   |               | * * *   | Good quality       |
| Colomer et al. 2007        | * * * *   |               | * * *   | Good quality       |
| Colomer et al. 2004        | * * * *   | *             | * * *   | Good quality       |
| Colomer et al. 2006        | * * * *   |               | * * *   | Good quality       |
| David et.al. 2008          | * * * *   | *             | * * *   | Good quality       |
| Darlix et al. 2016         | * * *     | *             | * * *   | Good quality       |
| Gioia et al. 2015          | * * * *   | *             | * * *   | Good quality       |
| Eppenberger et al. 2020    | * * * *   | *             | * * *   | Good quality       |
| Esteva et al. 2002         | * * *     | *             | * *     | Poor quality       |
| Finn et al. 2009           | * * * *   | *             | * * *   | Good quality       |
| Fornier et al. 2005        | * * *     |               | * * *   | Good quality       |
| Im et al. 2005             | * * * *   |               | * * *   | Good quality       |
| Jensen et al. 2003         | * * * *   | *             | * * *   | Good quality       |
| Knutson et al. 2014        | * * * *   |               | * * *   | Good quality       |
| Kong et al. 2012           | * * * *   | *             | * * *   | Good quality       |
| Kontani et al. 2013        | * * * *   |               | * *     | Poor quality       |
| Kostler et al. 2004        | * * *     | *             | * * *   | Good quality       |
| Lee et al. 2016            | * * *     |               | * *     | Poor quality       |
| Lee et al. 2014            | * * * *   |               | * * *   | Good quality       |
| Lipton et al. 2002         | * * *     | *             | * *     | Poor quality       |
| Lipton et al. 2003         | * * * *   | *             | * *     | Good quality       |
| Lipton et al. 2011         | * * * *   |               | * *     | Poor quality       |
| Ludovini et al. 2008       | * * * *   | *             | * * *   | Good quality       |
| Luftner et al. 2004        | * * * *   |               | * *     | Poor quality       |
| Molina et al. 2010         | * * * *   | *             | * *     | Good quality       |
| Moreno-Aspitia et al. 2013 | * * *     | *             | * * *   | Good quality       |
| Muller et al. 2004         | * * *     | *             | *       | Poor quality       |
| Reix et al. 2016           | * * * *   | *             | * *     | Good quality       |
| Ryu et al. 2012            | * * *     |               | * * *   | Poor quality       |
| Sandri et al. 2004         | * * * *   |               | * * *   | Good quality       |
| Shao et al. 2014           | * * * *   |               | *       | Poor quality       |

|                     |         |   |       |              |
|---------------------|---------|---|-------|--------------|
| Tchou et al. 2015   | ✱ ✱ ✱ ✱ | ✱ | ✱ ✱ ✱ | Good quality |
| Thureau et al. 2012 | ✱ ✱ ✱ ✱ | ✱ | ✱ ✱ ✱ | Good quality |
| Tsai et al. 2012    | ✱ ✱ ✱ ✱ | ✱ | ✱ ✱ ✱ | Good quality |
| Wang et al. 2016    | ✱ ✱ ✱ ✱ | ✱ | ✱ ✱   | Good quality |
| Witzel et al. 2006  | ✱ ✱ ✱ ✱ | ✱ | ✱ ✱ ✱ | Good quality |
| Zuo et al. 2021     | ✱ ✱ ✱   | ✱ | ✱ ✱ ✱ | Good quality |

**Supplementary Figure S1. Sensitivity analysis for PFS(a), DFS(b), OS(c) and ORR(d).**

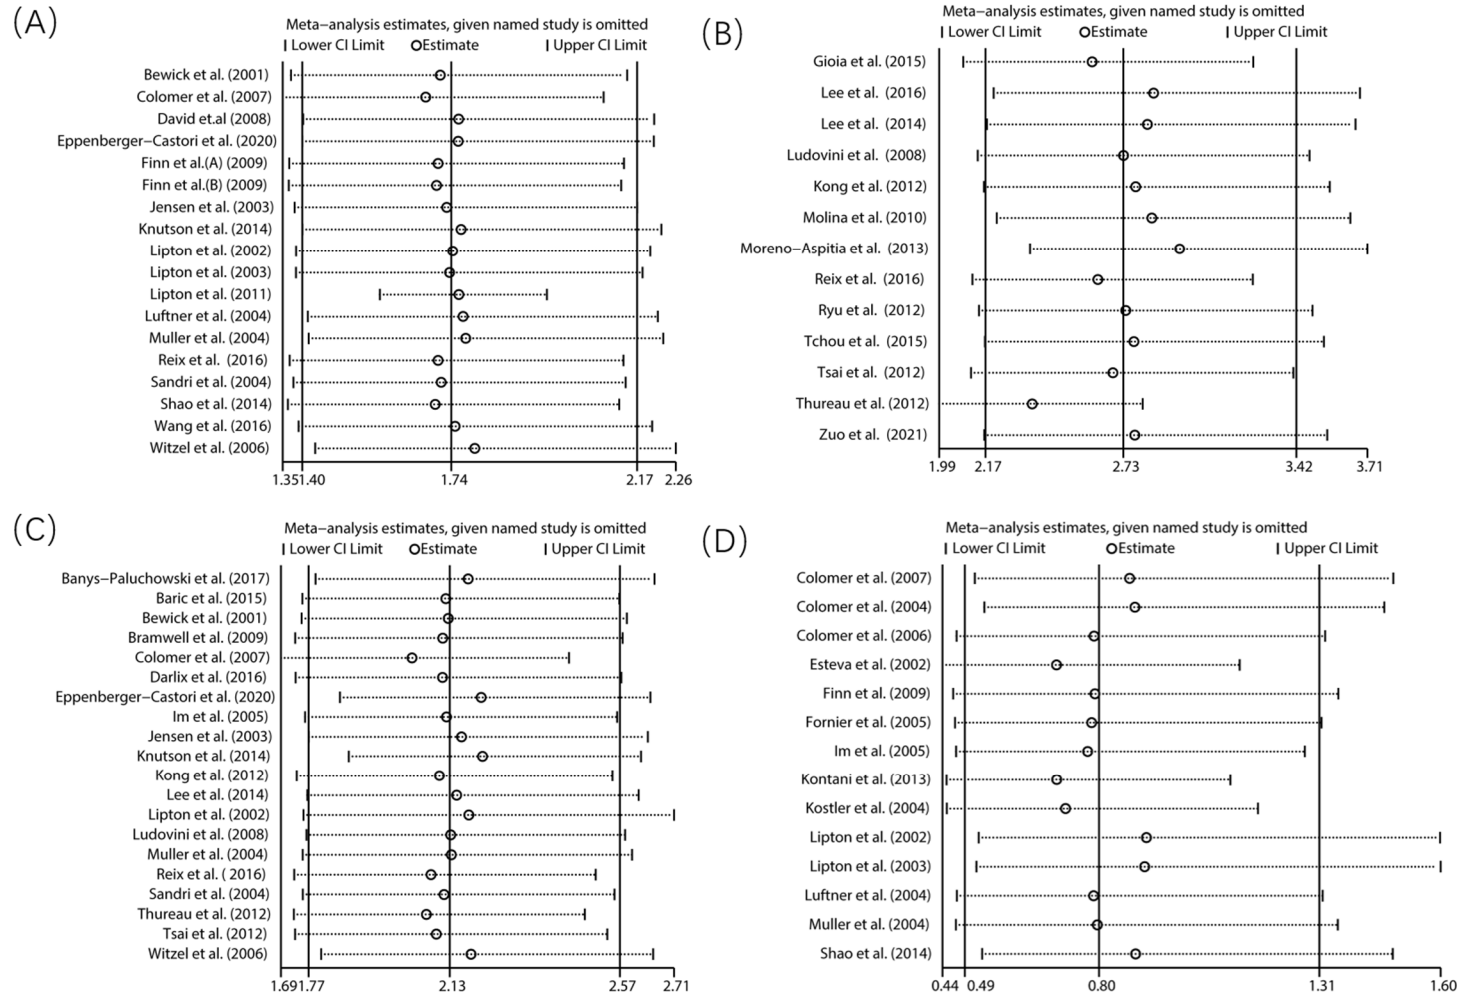

**Supplementary Figure S2. Subgroup analysis of PFS according to different treatment modalities(a) and cut-off values(b).**

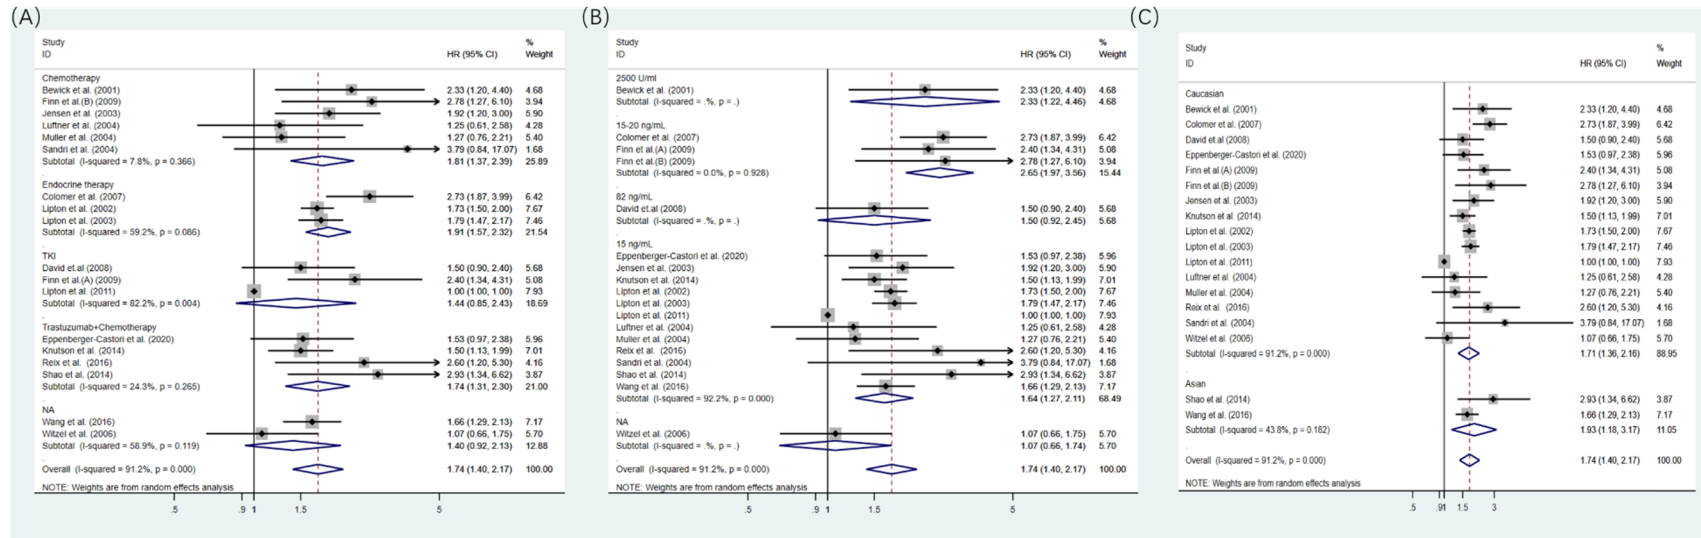

**Supplementary Figure S3. Subgroup analysis of DFS according to different treatment modalities(a) and cut-off values(b).**

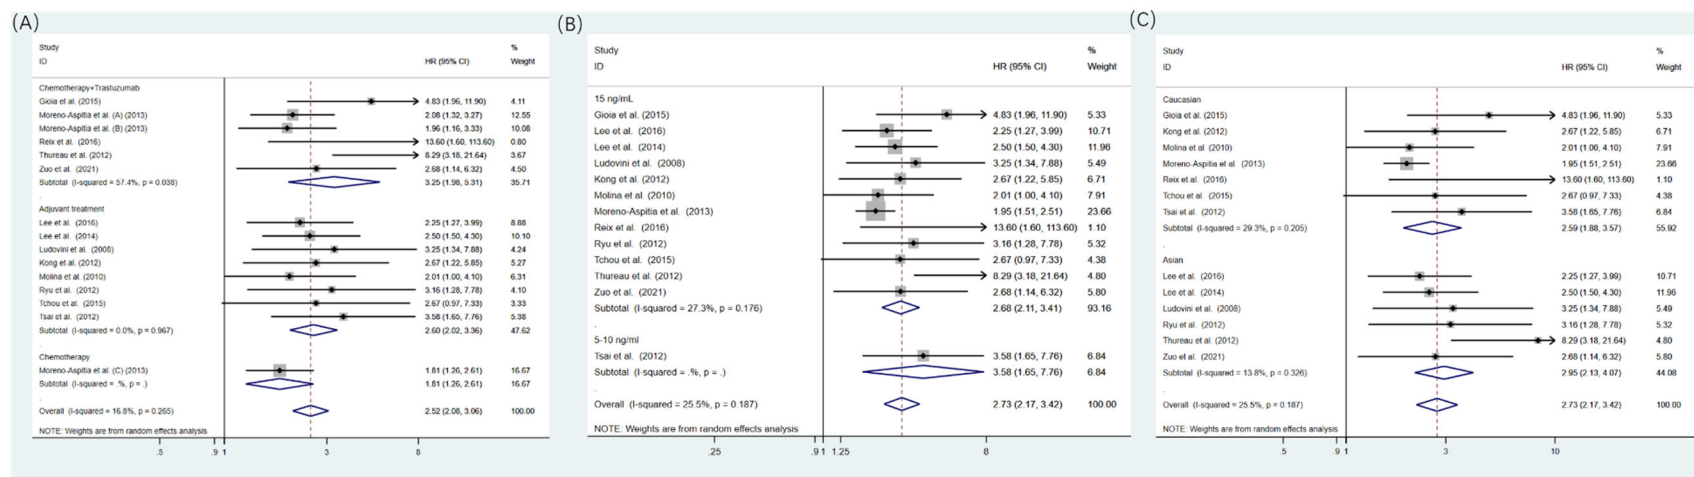



**Supplementary Figure S4.** Subgroup analysis of OS according to different treatment modalities(a), cut-off values(b), and disease status(c).

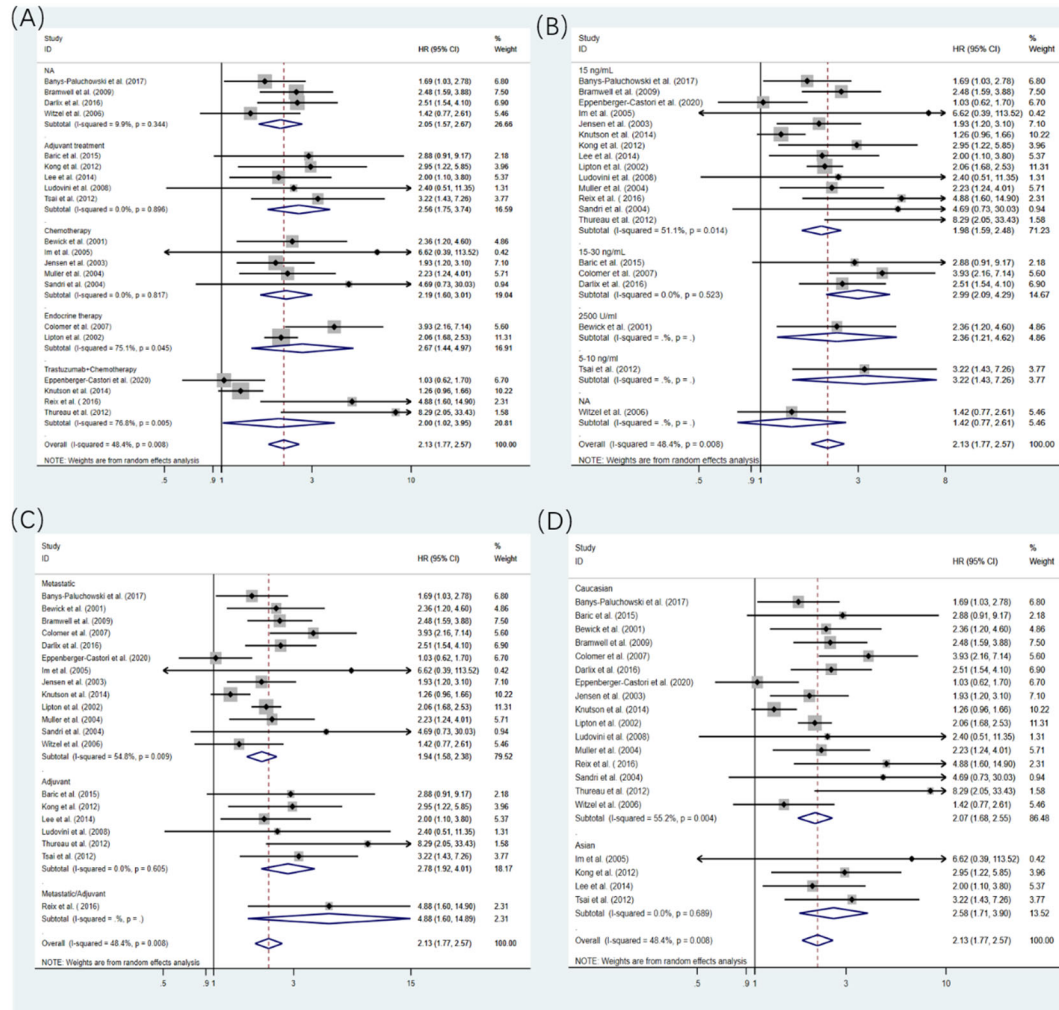

**Supplementary Figure S5. Subgroup analysis of ORR according to different treatment modalities(a) and cut-off values(b).**

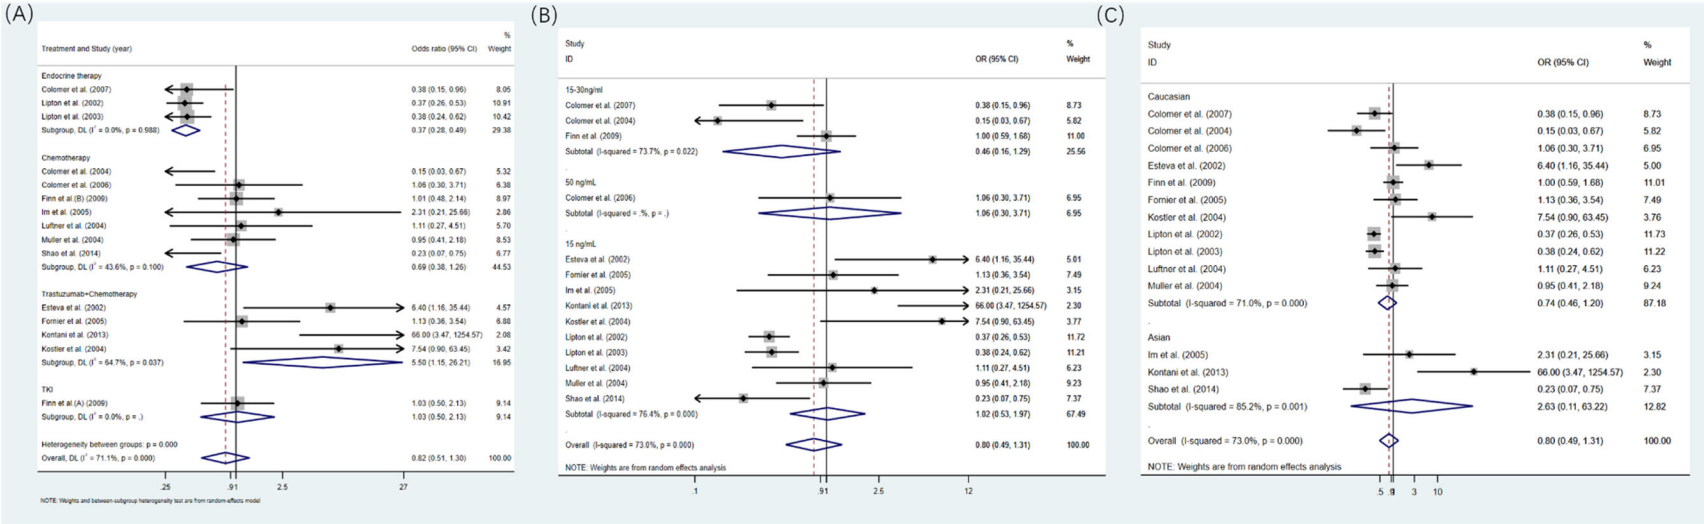

**Supplementary Figure S6.** Funnel plot to detect publication bias for PFS(a), DFS(b), OS(c) and ORR(d).

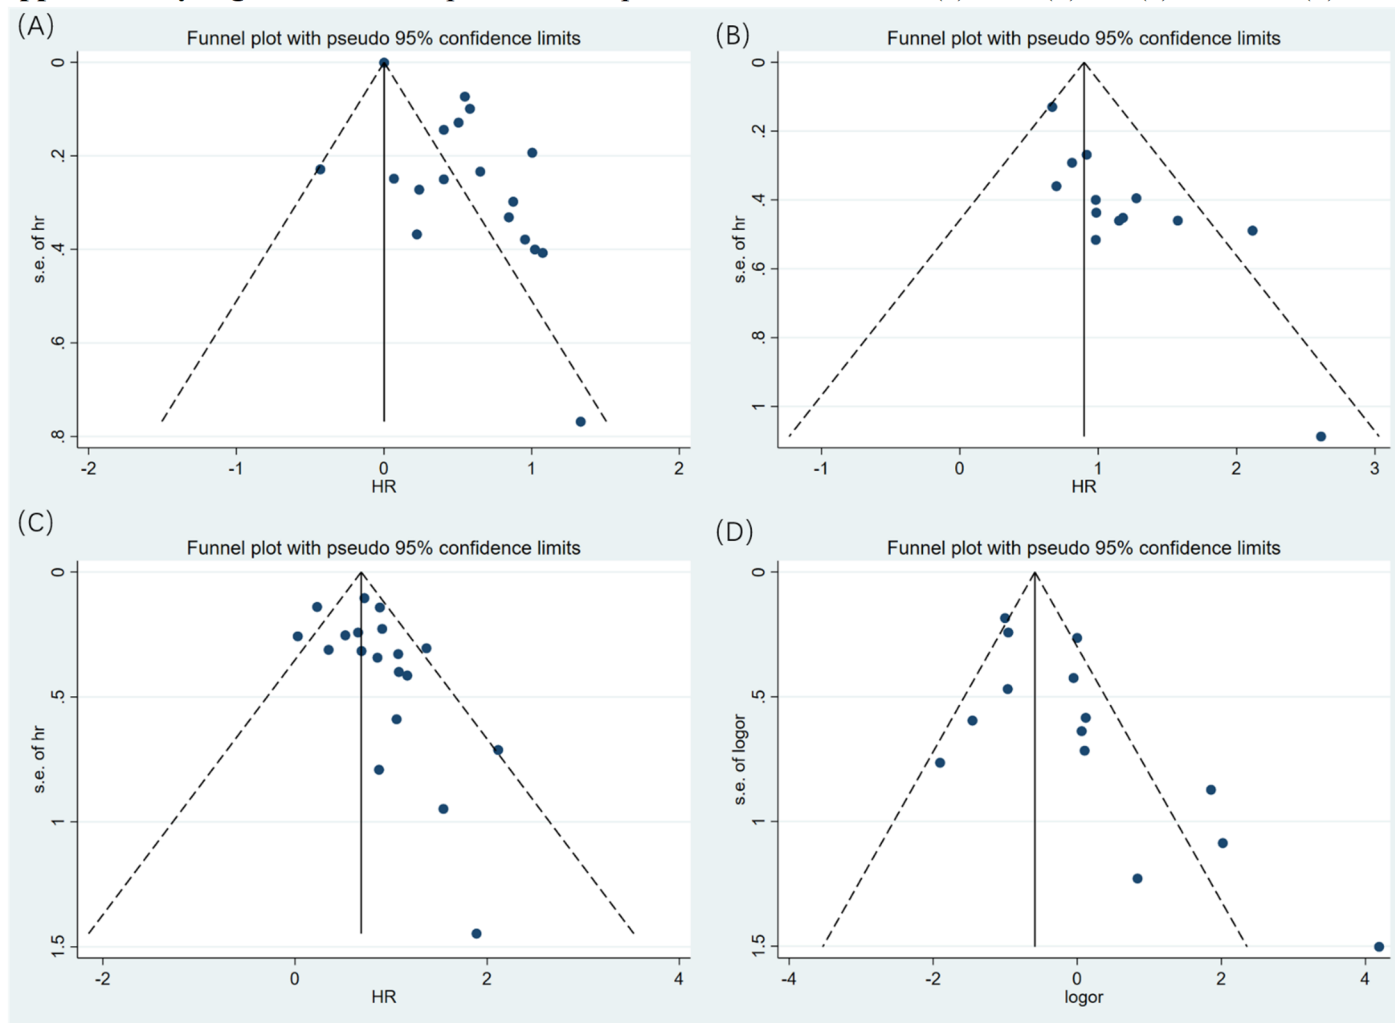

**Supplementary Figure S7.** Trim and fill analysis for pooled HR of PFS.

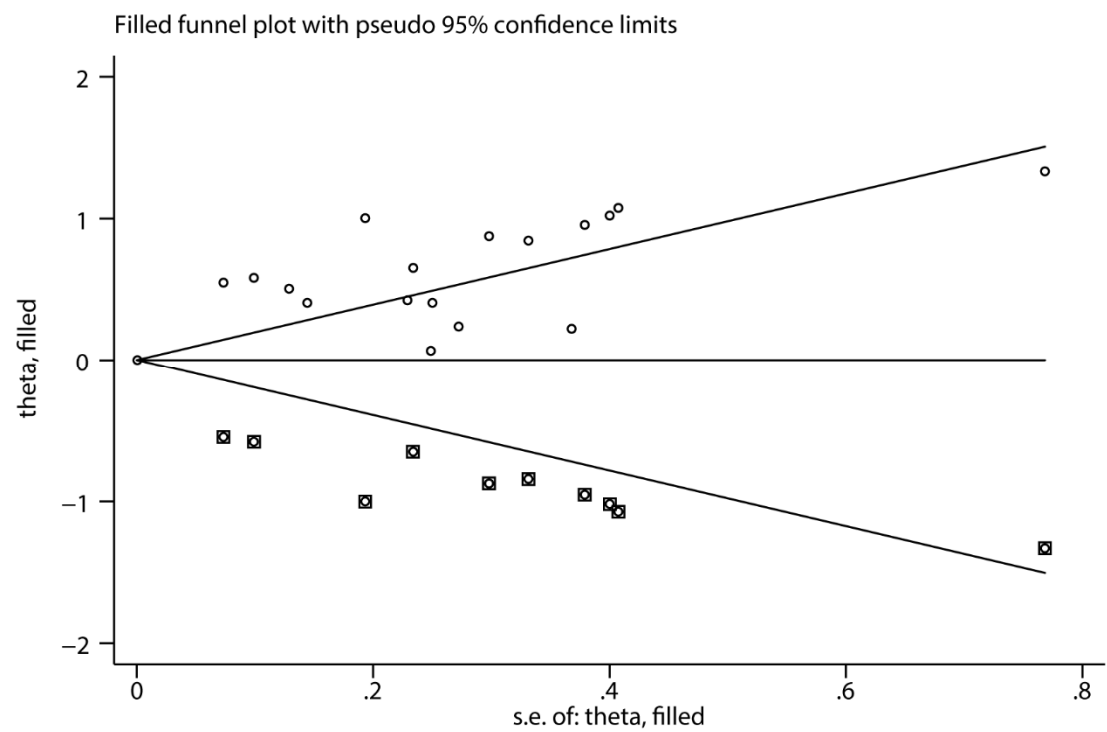

Supplement: s1 [file s1]
